# Supplementary material
Source: PubMed Central journal article supplement (PMC6409211)
Supplement: NIHMS1007162-supplement-Supplemental_Table.pdf [file NIHMS1007162-supplement-Supplemental_Table.pdf]

## Online Supporting Material

**Supplemental Table 1.** Screening characteristics of participants who completed the study (n = 20).

|                                    | Male (n = 9) |     |           | Female (n = 11) |     |           |
|------------------------------------|--------------|-----|-----------|-----------------|-----|-----------|
|                                    | Mean         | SEM | Range     | Mean            | SEM | Range     |
| <b>Age (years)</b>                 | 50.4         | 2.4 | 39-59     | 52.5            | 1.9 | 40-60     |
| <b>BMI (kg/m<sup>2</sup>)</b>      | 26.3         | 1.0 | 23.1-31.5 | 26.7            | 1.1 | 22.5-32.7 |
| <b>Brachial SBP (mm Hg)</b>        | 128.7        | 2.2 | 119-140   | 128.7           | 3.5 | 109-151   |
| <b>Brachial DBP (mm Hg)</b>        | 85.4         | 1.2 | 80-90     | 86.5            | 1.9 | 76-96     |
| <b>Glucose (mmol/L)†</b>           | 5.1          | 0.1 | 4.6-5.4   | 4.8             | 0.1 | 4.2-5.7   |
| <b>Total cholesterol (mmol/L)*</b> | 4.4          | 0.2 | 3.5-5.3   | 5.4             | 0.2 | 4.3-6.4   |
| <b>HDL-C (mmol/L)*</b>             | 1.2          | 0.1 | 0.9-1.7   | 1.7             | 0.1 | 1.3-2.4   |
| <b>TC:HDL†</b>                     | 4.0          | 0.4 | 2.0-5.6   | 3.3             | 0.2 | 2.2-4.3   |
| <b>LDL-C (mmol/L)*</b>             | 2.6          | 0.2 | 1.5-3.4   | 3.2             | 0.2 | 2.0-3.9   |
| <b>Triglycerides (mmol/L)</b>      | 1.4          | 0.3 | 0.6-3.3   | 1.2             | 0.1 | 0.7-2.3   |

\*indicates a significant difference between male and female participants,  $p \leq 0.05$ .

†indicates a trend towards a significant difference between male and female participants,  $p \leq 0.10$ .
